# Supplementary material for: Compound flood impact of water level and rainfall during tropical cyclone periods in a coastal city: the case of Shanghai
Source: Copernicus journal article supplement (doi:10.5194/nhess-22-2347-2022), 2022-07-18
Supplement: Supplementary file [file nhess-22-2347-2022-supplement.pdf]

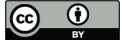

*Supplement of*

## **Compound flood impact of water level and rainfall during tropical cyclone periods in a coastal city: the case of Shanghai**

**Hanqing Xu et al.**

*Correspondence to:* Zhan Tian ([tianz@sustech.edu.cn](mailto:tianz@sustech.edu.cn)) and Jun Wang ([jwang@geo.ecnu.edu.cn](mailto:jwang@geo.ecnu.edu.cn))

The copyright of individual parts of the supplement might differ from the article licence.

**Table S1. Basic statistic characteristics of peak water level and rainfall.**

|                             |        | Kendall |                | Spearman |                |
|-----------------------------|--------|---------|----------------|----------|----------------|
| Accumulated days            |        | Corr    | <i>p</i> value | Corr     | <i>p</i> value |
| Peak water level - rainfall | 3-days | 0.16    | 0.0004         | 0.25     | 0.0003         |
|                             | 2-days | 0.18    | 0.001          | 0.28     | 0.0001         |
|                             | 1-days | 0.15    | 0.0008         | 0.23     | 0.0006         |

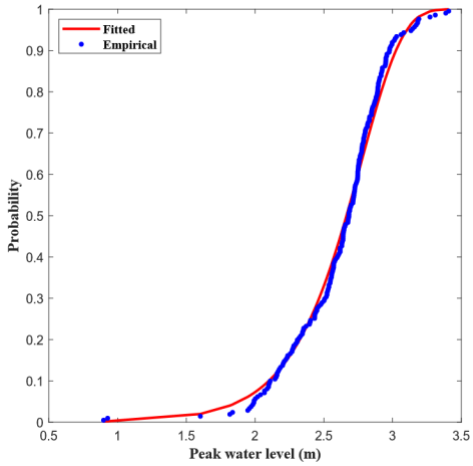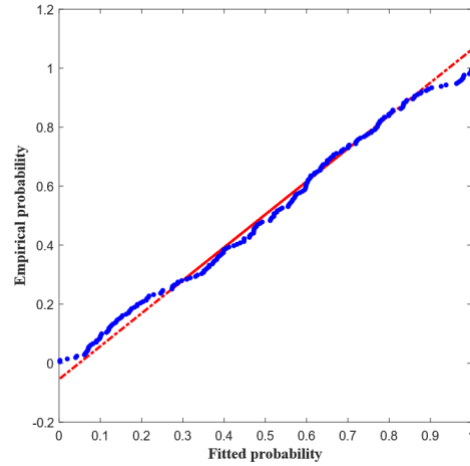

5 **Figure S1: The GEV marginal distribution of peak water level.**

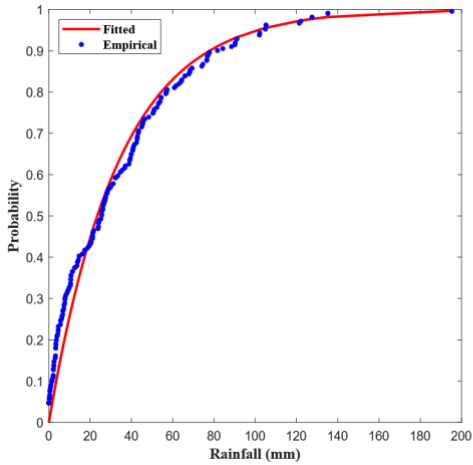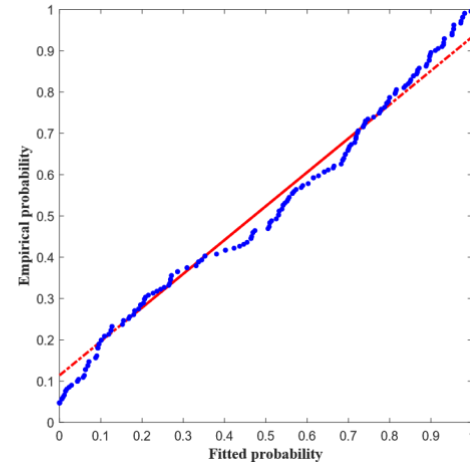

**Figure S2: The exponential marginal distribution of rainfall with 2-days window.**
